# Supplementary material for: Synthesis of n-Alkoxy Derivatives of Layered Perovskite-Like Niobate HCa2Nb3O10 and Study of Their Photocatalytic Activity for Hydrogen Production from an Aqueous Solution of Methanol
Source: MDPI journal article supplement (doi:10.3390/catal11080897), 2021-07-25

## Supporting Information S1

Diffuse reflectance spectra and Tauc plots for initial niobates and their *n*-alkoxy derivatives

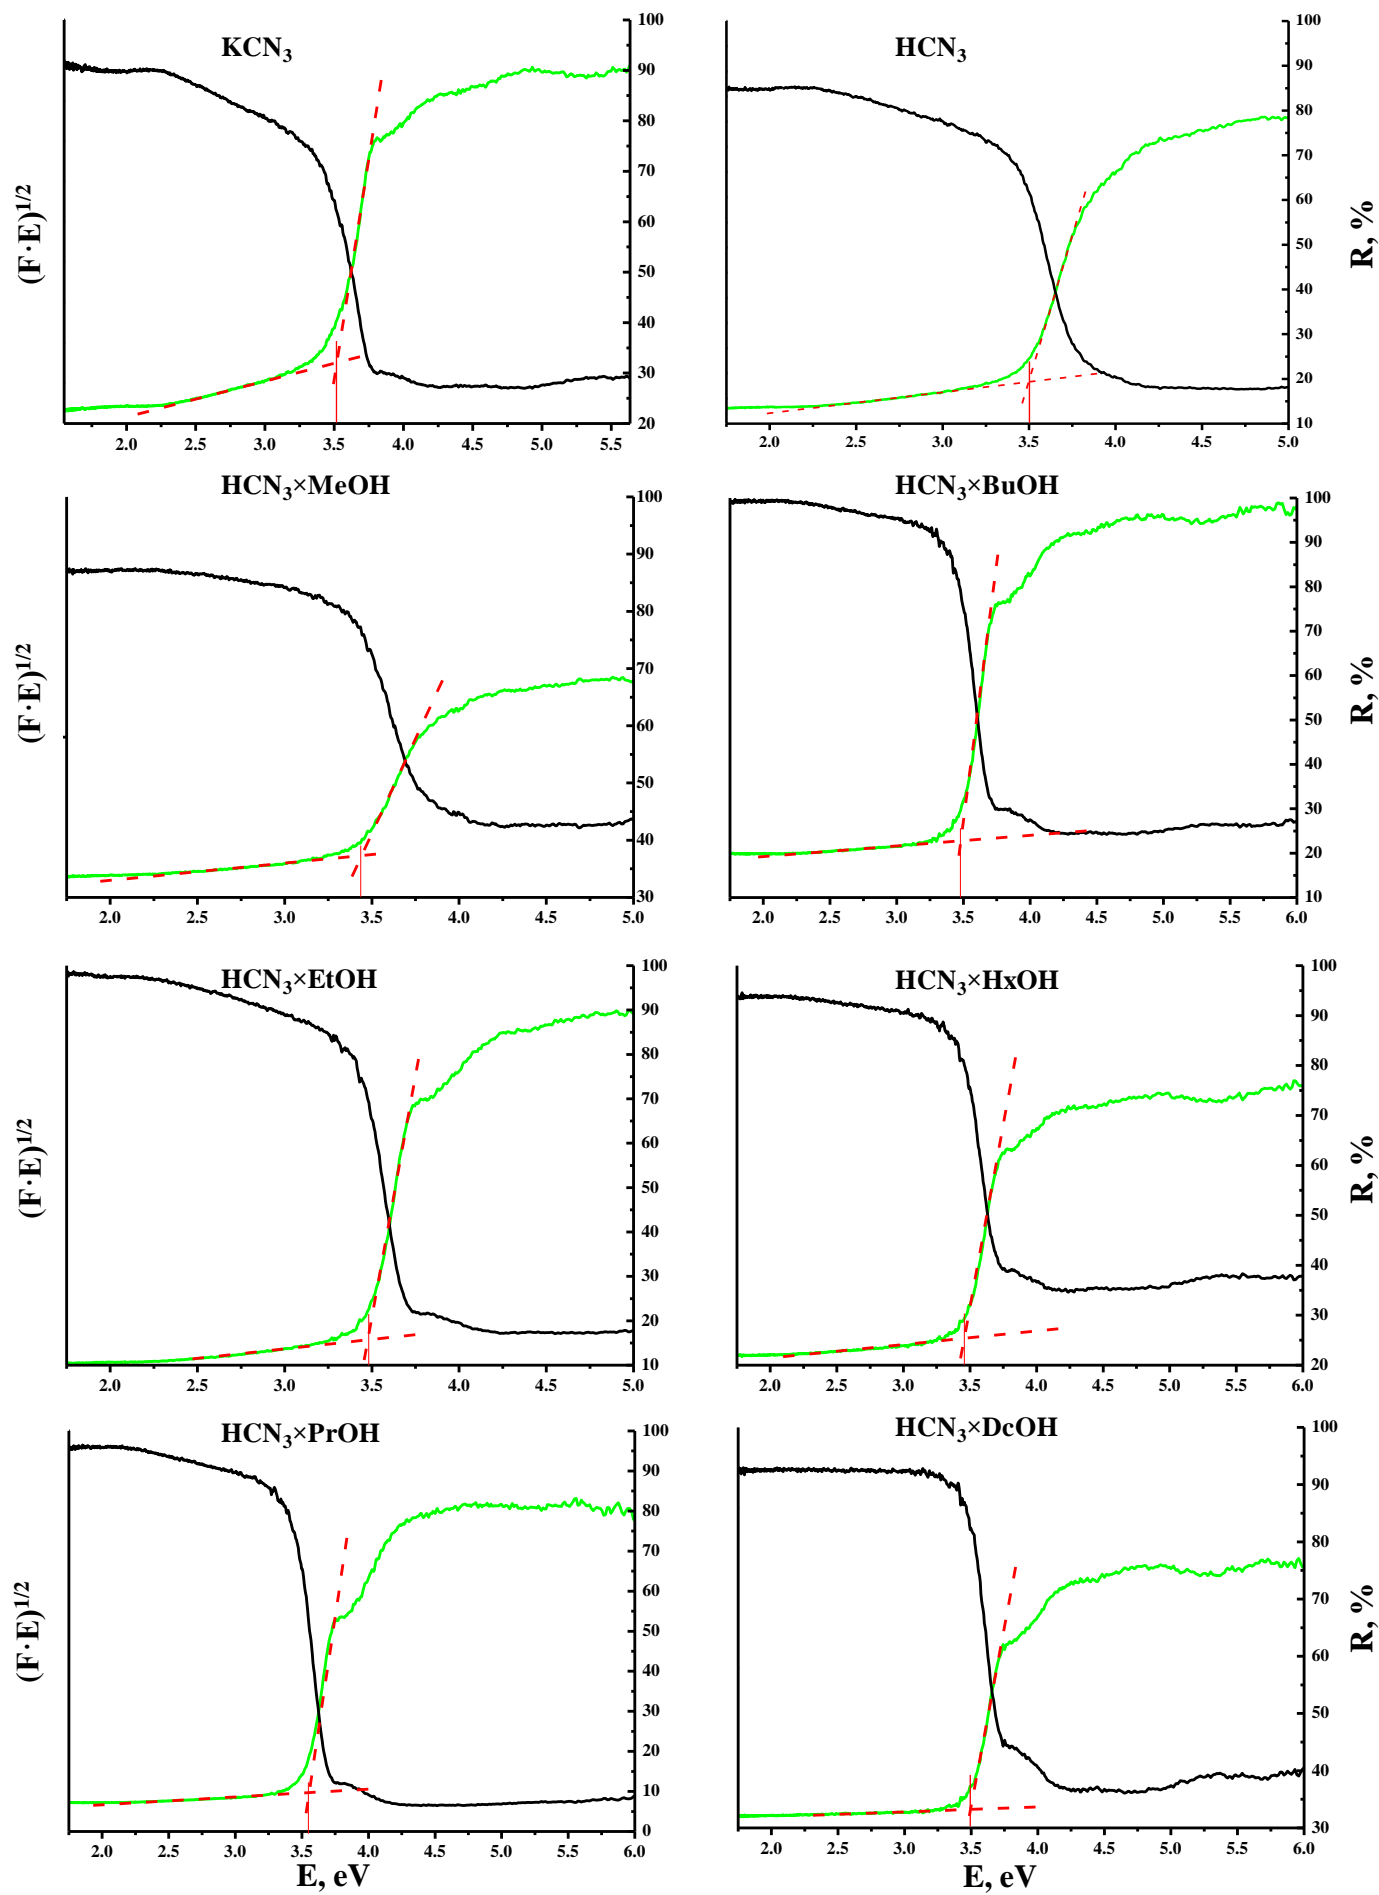

## Supporting Information S2

Quantitative compositions *n*-alkoxy derivatives before and after keeping under reduced pressure

| Sample                 | Organic content (x) |            |             |
|------------------------|---------------------|------------|-------------|
|                        | initial             | 5 d vacuum | 10 d vacuum |
| HCN <sub>3</sub> ×MeOH | 0.99                | 0.97       | 0.95        |
| HCN <sub>3</sub> ×EtOH | 0.82                | 0.66       | 0.64        |
| HCN <sub>3</sub> ×PrOH | 0.86                | 0.78       | 0.74        |
| HCN <sub>3</sub> ×BuOH | 0.86                | 0.77       | 0.76        |
| HCN <sub>3</sub> ×HxOH | 0.86                | 0.79       | 0.78        |
| HCN <sub>3</sub> ×DcOH | 0.90                | 0.70       | 0.70        |

### Supporting Information S3

XRD patterns of *n*-alkoxy derivatives before and after water treatment

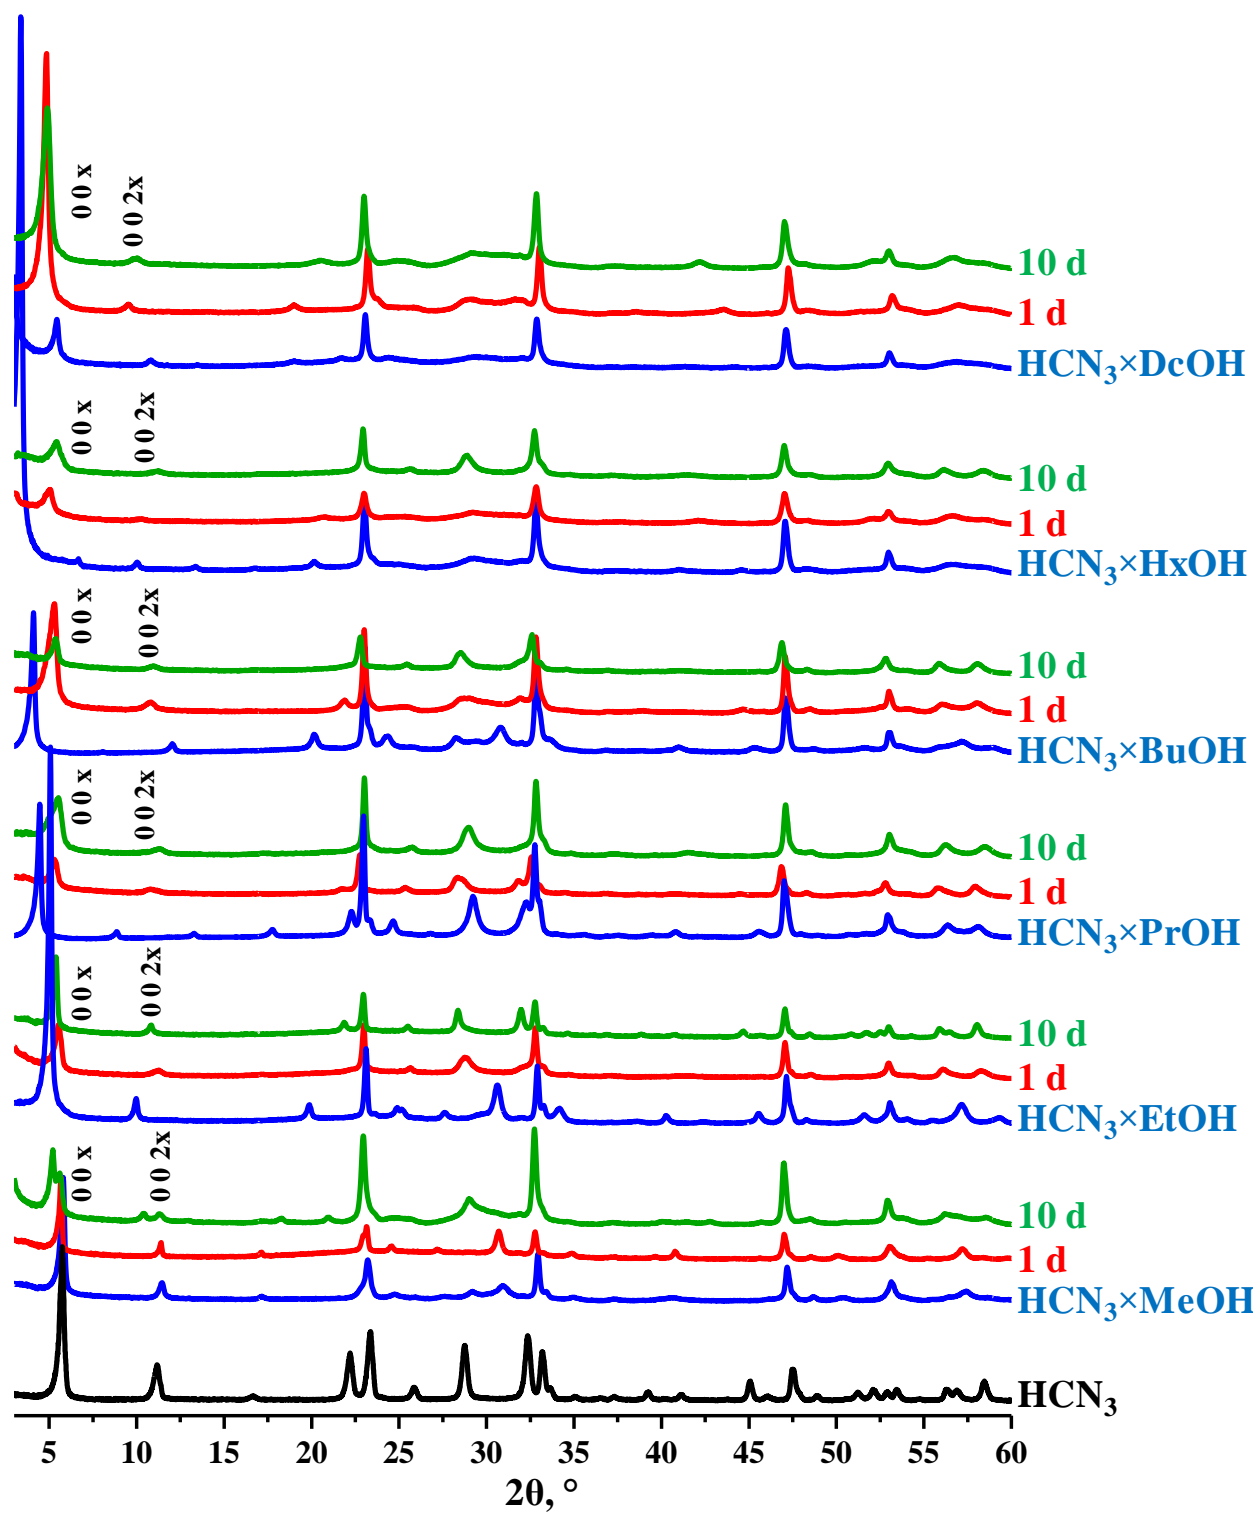

## Supporting Information S4

Raman spectra of *n*-alkoxy derivatives before and after water treatment

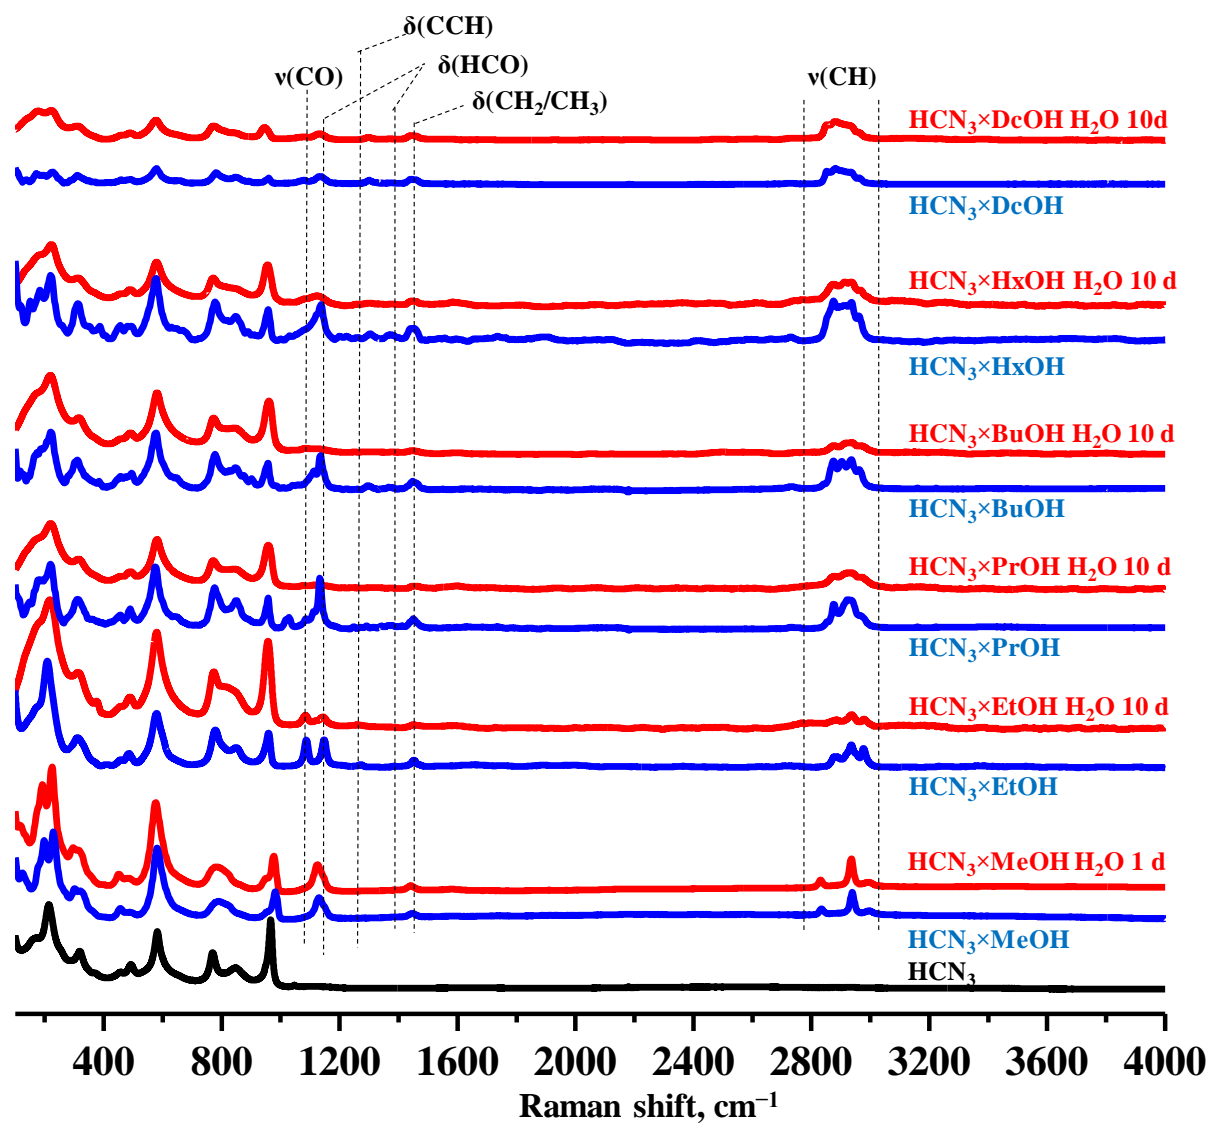

### Supporting Information S5

Actual volume concentrations and pH values of reaction suspensions

| Photocatalyst             | c <sub>1</sub> , mg/l | c <sub>2</sub> , mg/l | c <sub>3</sub> , mg/l | pH <sub>1</sub> | pH <sub>2</sub> | pH <sub>3</sub> |
|---------------------------|-----------------------|-----------------------|-----------------------|-----------------|-----------------|-----------------|
| KCN <sub>3</sub>          | 123                   | 109                   | 0.16                  | 6.6             | 7.1             | 7.1             |
| KCN <sub>3</sub> /Pt      | 54.0                  | 51.5                  | –                     | 5.3             | 4.8             | 4.5             |
| HCN <sub>3</sub>          | 163                   | 157                   | 0.00                  | 4.2             | 4.0             | 3.9             |
| HCN <sub>3</sub> /Pt      | 113                   | 110                   | –                     | 3.5             | 3.2             | 3.2             |
| HCN <sub>3</sub> ×MeOH    | 206                   | 61.4                  | 0.04                  | 4.3             | 3.8             | 3.7             |
| HCN <sub>3</sub> ×MeOH/Pt | 139                   | 138                   | –                     | 3.7             | 3.3             | 3.4             |
| HCN <sub>3</sub> ×EtOH    | 155                   | 65.8                  | 1.70                  | 4.3             | 3.8             | 3.8             |
| HCN <sub>3</sub> ×EtOH/Pt | 165                   | 149                   | –                     | 3.7             | 3.2             | 3.2             |
| HCN <sub>3</sub> ×PrOH    | 200                   | 85.6                  | 0.09                  | 4.3             | 4.0             | 4.1             |
| HCN <sub>3</sub> ×PrOH/Pt | 207                   | 195                   | –                     | 3.3             | 3.5             | 3.5             |
| HCN <sub>3</sub> ×BuOH    | 198                   | 87.6                  | 0.07                  | 4.3             | 4.0             | 4.0             |
| HCN <sub>3</sub> ×BuOH/Pt | 216                   | 208                   | –                     | 3.8             | 3.5             | 3.5             |
| HCN <sub>3</sub> ×HxOH    | 333                   | 116                   | 0.15                  | 4.3             | 3.9             | 3.9             |
| HCN <sub>3</sub> ×HxOH/Pt | 300                   | 279                   | –                     | 3.9             | 3.5             | 3.6             |
| HCN <sub>3</sub> ×DcOH    | 267                   | 63.1                  | 0.17                  | 4.1             | 3.9             | 3.9             |
| HCN <sub>3</sub> ×DcOH/Pt | 197                   | 153                   | –                     | 3.9             | 3.6             | 3.6             |

## Supporting Information S6

Comparison of actual concentrations of photocatalysts in the reaction suspensions in the beginning and in the ending of photocatalytic measurements

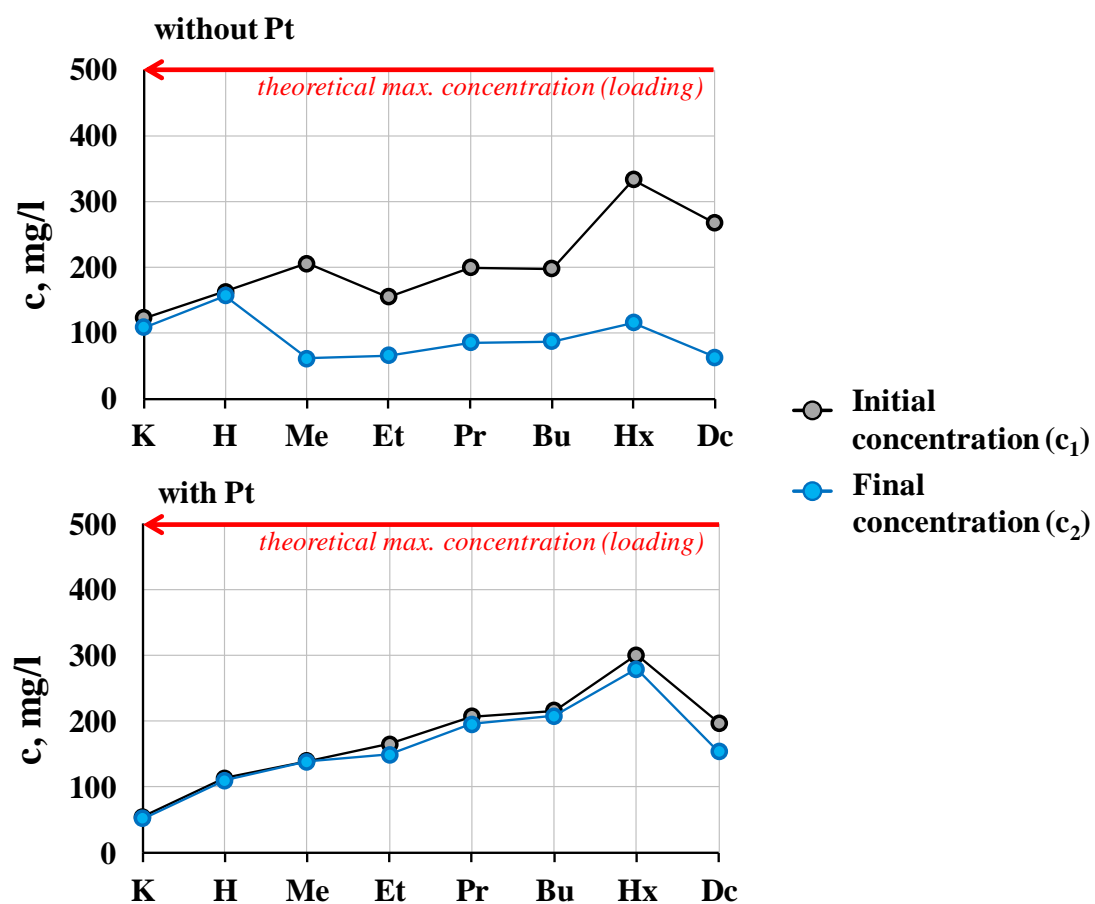

## Supporting Information S7

XRD patterns of some *n*-alkoxy derivatives before and after photocatalytic (PC) experiments

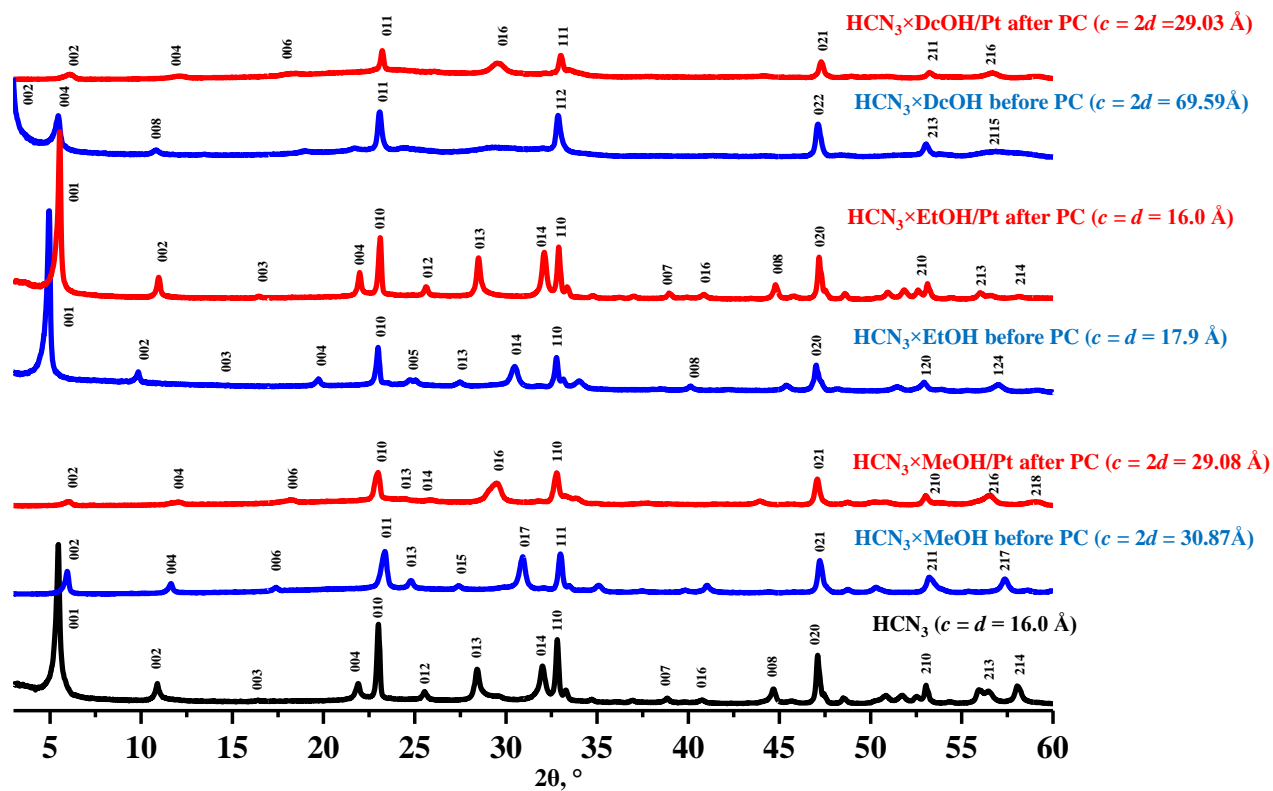

## Supporting Information S8

Raman spectra of some *n*-alkoxy derivatives before and after photocatalytic (PC) experiments

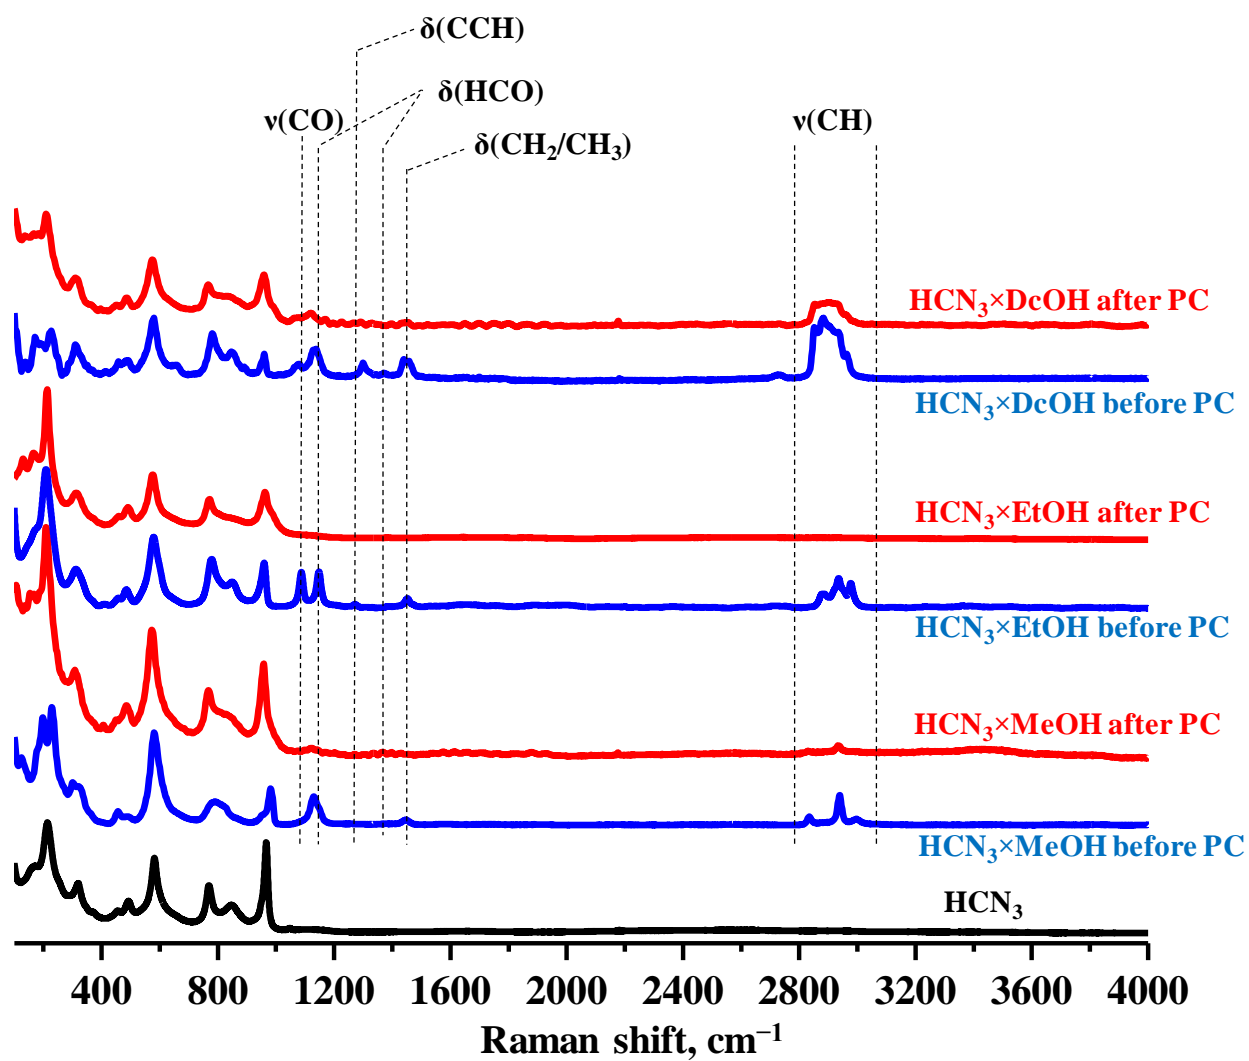



## Supporting Information S9

TG curves of some *n*-alkoxy derivatives before and after photocatalytic (PC) experiments

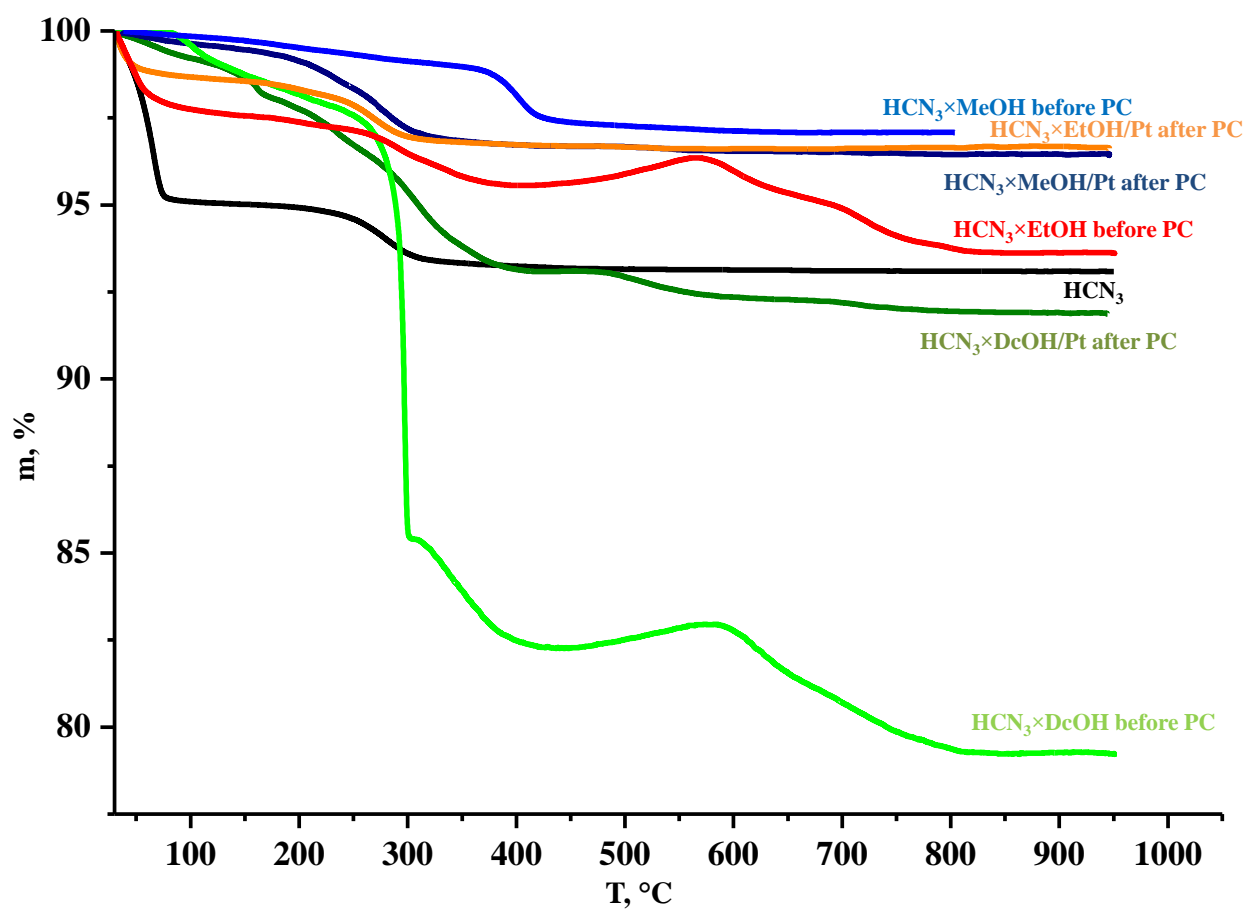

## Supporting Information S10

SEM images of some *n*-alkoxy derivatives before and after photocatalytic (PC) experiments

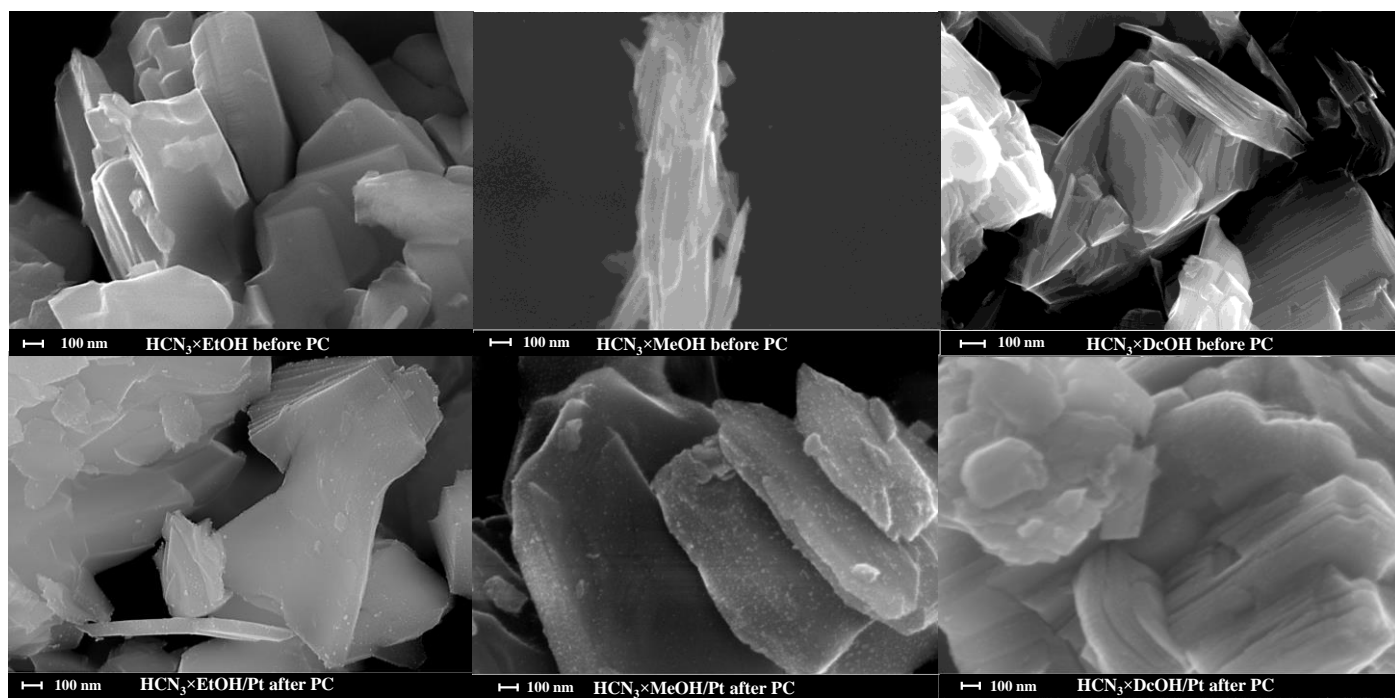

## Supporting Information S11

Scheme of (a) photocatalytic setting and (b) reaction cell

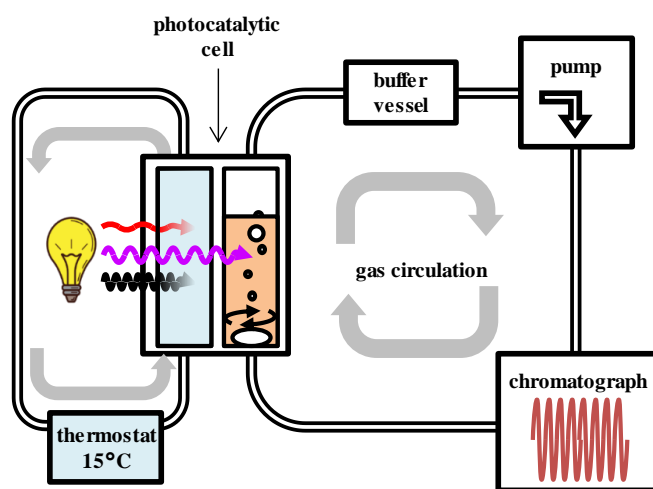

(a)

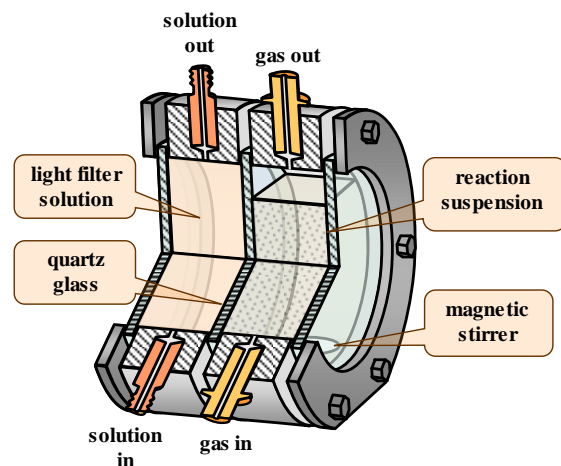

(b)

## Supporting Information S12

### Spectrophotometric calibrations for express measurement of photocatalytic suspensions' concentrations

To prepare the calibration plot for suspensions of the bulk non-exfoliated niobate for determination concentrations  $c_1$  and  $c_2$  during photocatalytic experiments, 30 mg of  $\text{HCN}_3$  was added to 60 ml of 1 mol. % methanol. Then the mixture was sonicated for 10 min in an Elmasonic S10H bath (60 W). Afterwards, the suspension obtained was used to build the spectrophotometric calibration dependence in coordinates optical density (A) – niobate concentration in mg/l (c). For this, a series of spectra with various suspension dilutions was recorded, analytical wavelength  $\lambda = 550$  nm was selected and the linear approximation of the experimental dependence  $A_\lambda = A_\lambda(c)$  was found using the least-squares method (graph a).

To prepare the calibration plot for suspensions of the niobate exfoliated into nanolayers for determination concentration  $c_3$  during photocatalytic experiments, 30 mg of  $\text{HCN}_3$  was placed into a glass tube with 30 ml of 0.004 M aqueous tetrabutylammonium hydroxide (TBAOH) and sonicated by a Hielscher UP200St (200 W) homogenizer at half power for 5 min. After shaking at room temperature for 24 h, the suspension was sonicated for 5 min again. Hereafter bulk non-exfoliated particles were separated via centrifuging at a separation factor  $F = 1000$  for 1 h and concentration of the suspension obtained was determined by ICP-AES after preliminary acid digestion. To obtain the calibration plot A – c (mg/l), a series of spectra with various suspension dilutions was recorded, analytical wavelength  $\lambda = 230$  nm was selected and the linear approximation of the experimental dependence  $A_\lambda = A_\lambda(c)$  was found using the least-squares method (graph b).

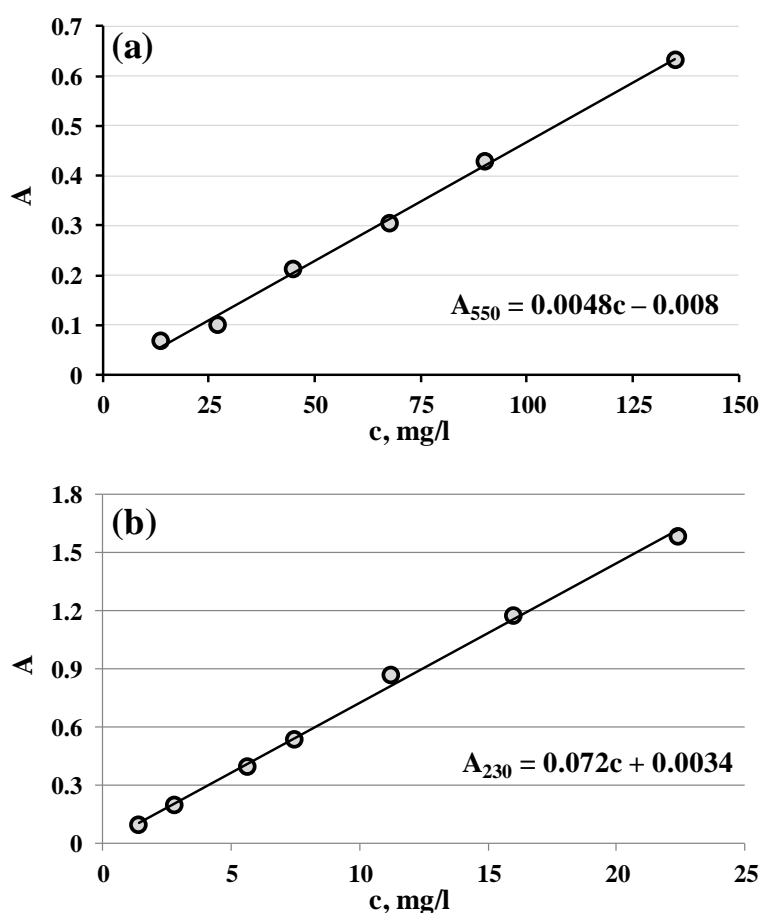

Supplement: s1 [file s1]
