# Supplementary material for: Synthesis of n-Alkoxy Derivatives of Layered Perovskite-Like Niobate HCa2Nb3O10 and Study of Their Photocatalytic Activity for Hydrogen Production from an Aqueous Solution of Methanol
Source: MDPI journal article supplement (doi:10.3390/catal11080897), 2021-07-25
Supplement: s1 [file s1]

Archive with 1 entries (1 files):
- catalysts-1305504-supplementary.pdf
